# Supplementary material for: Tandem white organic light-emitting diodes stacked with two symmetrical emitting units simultaneously achieving superior efficiency/CRI/color stability
Source: publisher site journal article supplement (doi:10.1515/nanoph-2019-0175), 2019-08-02
Supplement: Supplementary file 1 [file nanoph-2019-0175_suppl.docx]

**Supporting information**

**Tandem white organic light-emitting diodes stacked with two symmetrical emitting units simultaneously achieving superior efficiency/CRI/color stability**

Yanqin Miao,*,a Xiaozhen Wei,a Long Gao,a Kexiang Wang,b Bo Zhao,a Zhongqiang Wang,a Bin Zhao,c Hua Wang,*,a Yucheng Wu,a and Bingshe Xua

a*Key Laboratory of Interface Science and Engineering in Advanced Materials, Ministry of Education, Taiyuan University of Technology, Taiyuan 030024, China*

b*Key Laboratory of Bio-inspired Smart Interfacial Science and Technology of Ministry of Education, School of Chemistry, Beihang University, Beijing 100191,China.*

c*State Key Laboratory of Fluid Power and Mechatronic Systems, Zhejiang University, Hangzhou 310027, China*

**Corresponding e-mails:** miaoyanqin@tyut.edu.cn (**Yanqin Miao**); wanghua001@tyut.edu.cn (**Hua Wang**).

**Section S1**

ITO glass substrates were scrubbed and sonicated consecutively with detergent water, deionized water, and acetone, dried in drying cabinet, and then exposed to a UV ozone environment for 10 min. After these processes, the cleaned ITO glass substrates were loaded in a vacuum chamber, a base pressure of ≤ 5×10-4 Pa, for film deposition using thermal evaporation technology. The deposition rate and film thickness were monitored controlled by the calibrated crystal quartz sensors, e.g., the deposition rates of organic materials, MoO3, LiF, and cathode Al were controlled at about 1 Å/s, 0.3 Å/s, 0.1 Å/s, and 3−6 Å/s, respectively. Organic films for transmittance measurements were fabricated with the same method as device fabrication. The EL spectra and CIE coordinates of all OLEDs were measured by a computer controlled PR-655 spectra scan spectrometer. The J-V-L characteristics, CE, and PE were recorded by a computer-controlled Keithley 2400 source integrated with a BM-70A luminance meter.

**Fig. S1** The device structure diagram of all single unit reference blue device B0 and tandem blue devices B1-B4..

**Fig. S2** The J-V-L curves of the single unit reference device B0 of ITO(180 nm)/HAT-CN(5 nm)/TAPC(40 nm)/TCTA:TmPyPB (1:1): 15wt%FIrpic(20 nm)/TmPyPB(15 nm)/TmPyPB: 10wt%LiF(25 nm)/LiF(1 nm)/Al(100 nm).

**Fig. S3** The J-V-L (a, d, and g), CE-L-EQE (b, e, and h), and PE-L (c, f, and i) curves of all single unit white devices S1-S3.

**Table S1** The comparison of EL performance for white devices involved in this work and reported in literatures.

| Device | Von  (V) | Maximum | | | CIE | CRI |
| --- | --- | --- | --- | --- | --- | --- |
| CE(cd/A) | PE(lm/W) | EQE(%) |
| This work(W4) | 5.5 | 76.16 | 40.16 | 34.78 | (0.459, 0.438) | 91 |
| This work(W5) | 5.5 | 74.61 | 40.37 | 34.72 | (0.480, 0.434) | 92 |
| This work(W6) | 5.5 | 66.83 | 34.87 | 33.43 | (0.495, 0.425) | 94 |
| Ref. 1 | 5.5 | ------ | 39.86 | 38.34 | (0.452, 0.439) | 90.9 |
| Ref. 2 | 6.0 | 94.9 | 42.3 | 31.6 | (0.320, 0.380) | ------ |
| Ref. 3 | 5.5 | 57.6 | 29.6 | 24.7% | (0.390, 0.403) | 93 |
| Ref. 4 | 4.0 | 27.7 | 15.8 | 11.6 | (0.250, 0.390) | 70.6 |
| Ref. 5 | 5.1 | 81.2 | 42.9 | ------ | (0.350, 0.470) | 56 |
| Ref. 6 | 5.4 | ------ | 49 | 46% | (0.327, 0.391), | 71 |
| Ref. 7 | ----- | 38 | 22.9 | ------ | (0.436, 0.409) | 85 |
| Ref. 8 | 7.4 | 78.5 | ------ | 28.8% | (0.330, 0.450) | ------ |
| Ref. 9 | 8.4 | 51.2 | 19.1 | 26.0 | (0.316, 0.318) | ------ |
| Ref. 10 | 6.89 | 41.5 | 18.92 | 18.59 | (0.360, 0.410) | ------ |

[1] Cho H, Joo C W, Lee J, et al. Design and fabrication of two-stack tandem-type all-phosphorescent white organic light-emitting diode for achieving high color rendering index and luminous efficacy. Opt. Express 2016; 24(21): 24161-8.

[2] Zhang X, Zhang M, Liu M, et al. Highly efficient tandem organic light-emitting devices adopting a nondoped charge-generation unit and ultrathin emitting layers. Org. Electron. 2018; 53: 353-60.

[3] Shi C, Sun N, Wu Z, et al. High performance hybrid tandem white organic light-emitting diodes by using a novel intermediate connector. J. Mater. Chem. C 2018; 6(4): 767-72.

[4] Hung W Y, Fang G C, Lin S W, et al. The first tandem, all-exciplex-based WOLED. Sci. Rep. 2014; 4:5161.

[5] Liu B, Wang L, Tao H, et al. Doping-free tandem white organic light-emitting diodes. Sci. Bull. 2017; 62: 1193–200.

[6] Lee S, Shin H, Kim J J. High-efficiency orange and tandem white organic light-emitting diodes using phosphorescent dyes with horizontally oriented emitting dipoles. Adv. Mater. 2014; 26(33): 5864-8.

[7] Yu Y, Cao C, Wu Z, et al. Improving the color-rendering index of a tandem warm white organic light-emitting device by employing a simple fabrication process, Opt. Lett. 2019; 44(4): 931-4.

[8] Huang C, Xie Y, Wu S, et al. Thermally activated delayed fluorescence‐based tandem OLEDs with very high external quantum efficiency. Phys. Status Solidi A 2017; 214(10): 1700240.

[9] Bin J K, Lee N Y, Lee S J, et al. Two-stacked tandem white organic light emitting diodes employing WO3 as a charge generation layer. Proc. of SPIE 2016; 9941: 99411T.

[10] Xu T, Zhou J G, Fung M K, et al. Simplified efficient warm white tandem organic light-emitting devices by ultrathin emitters using energy transfer from exciplexes. Org. Electron. 2018; 63: 369-375.
